# Supplementary material for: Effects of the Leptin-Mediated MAPK/ERK Signaling Pathway on Collagen II Expression in Knee Cartilage of Newborn Male Mice from Obese Maternal Offspring
Source: MDPI journal article supplement (doi:10.3390/biom12030477), 2022-03-21
Supplement: s1 [file s1]

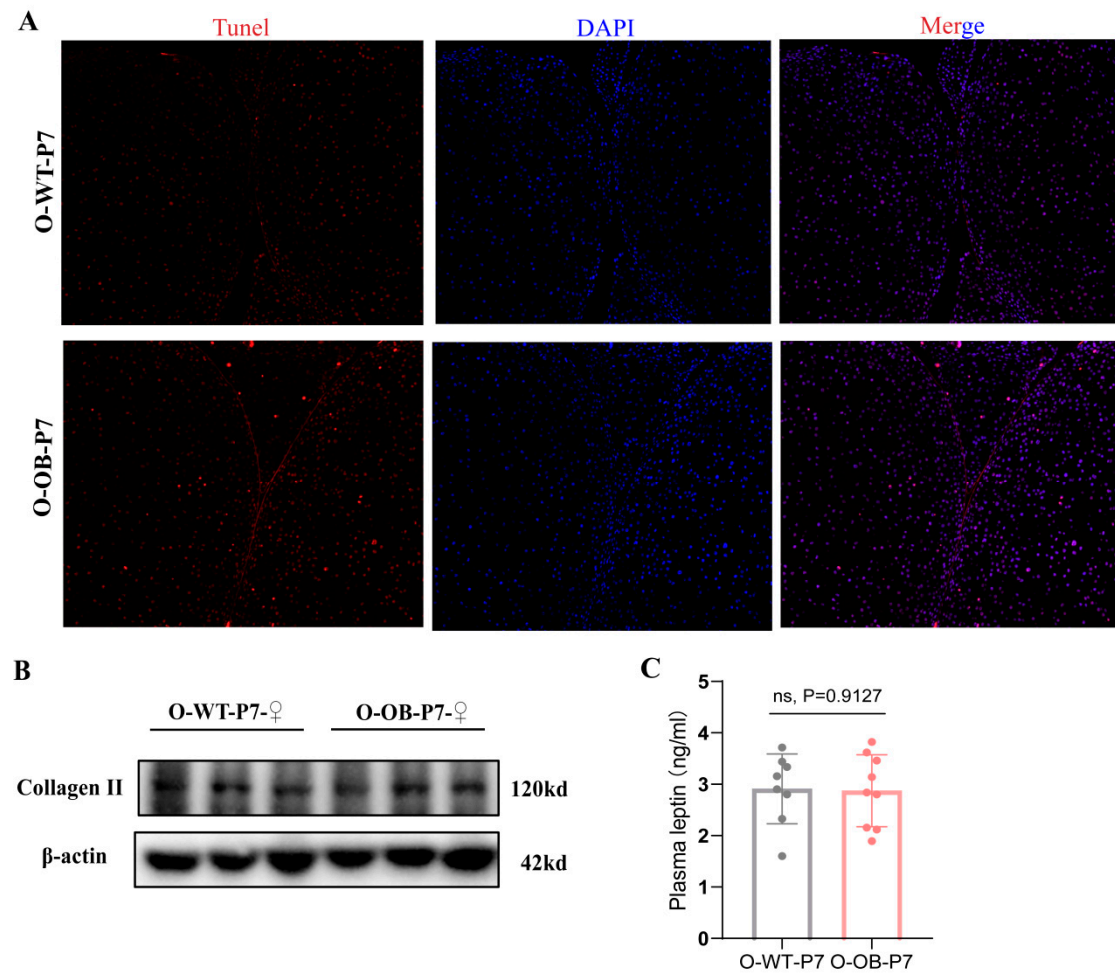

**Figure S1.** Results of TUNEL staining of knee cartilage in neonatal 7-day male mice from control and obese offspring, and cartilage collagen II and plasma leptin expression in neonatal 7-day female mice from control and obese offspring. **(A)** Representative images of TUNEL staining of knee cartilage in knee cartilage 7-day male mice offspring in control versus obese group ( $\times 200$  magnification). **(B)** Representative western blot bands of the expression of collagen II in knee cartilage 7-day female mice offspring in control versus obese group. **(C)** Plasma leptin level of 7-day female mice offspring in control versus obesity groups.

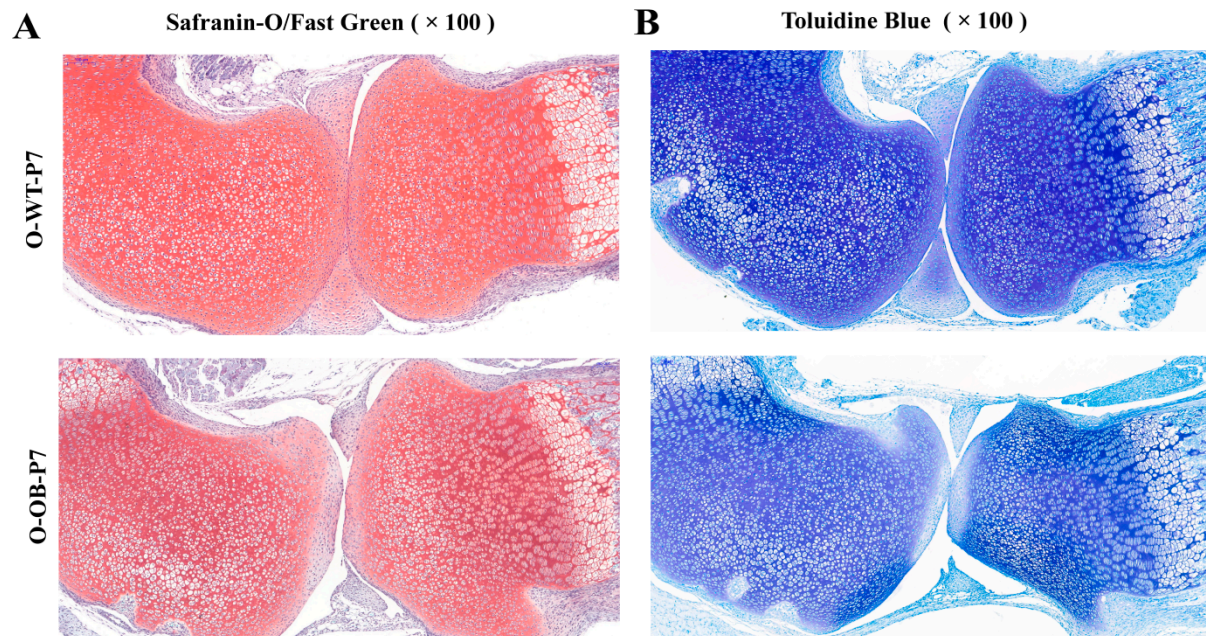

**Figure S2.** Full view of the knee joint in obese and normal offspring of newborn 7th-day male mice. **(A)** Representative images of knee cartilage stained with Safranin O/fast green and **(B)** toluidine blue in control versus obese offspring (×200 magnification).

**Table S1. Statistical description and analysis of Figure 1.**

|                          | <b>WT-mother<br/>(n=8)</b> | <b>OB-mother<br/>(n=8)</b> | <b>t</b> | <b>P</b> |
|--------------------------|----------------------------|----------------------------|----------|----------|
| Weight (g)-4-week-old    | 16.66±0.82                 | 16.47±1.02                 | 0.42     | 0.682    |
| Weight (g)-12-week-old   | 19.26±1.04                 | 23.76±1.52                 | -6.93    | <0.001   |
|                          | <b>O-WT-P7<br/>(n=25)</b>  | <b>O-OB-P7<br/>(n=19)</b>  | <b>t</b> | <b>P</b> |
| Weight (g)               | 3.38±0.29                  | 2.76±0.56                  | 4.36     | <0.001   |
| Length (cm)              | 3.99±0.12                  | 3.77±0.20                  | 4.29     | <0.001   |
| BMI (g/cm <sup>2</sup> ) | 0.21±0.02                  | 0.19±0.03                  | 2.66     | 0.011    |

**Table S2. *P*-values of the correlation coefficients for Figure 4C.**

|               | <i>LEPR</i> | <i>COL2A1</i> | <i>RUNX2</i> | <i>SOX9</i> | <i>MMP1a</i> | <i>TIMP1</i> |
|---------------|-------------|---------------|--------------|-------------|--------------|--------------|
| <i>TIMP1</i>  | 0.001       | 0.001         | 0.003        | 0.003       | 0.079        | -            |
| <i>MMP1a</i>  | 0.028       | 0.013         | 0.007        | 0.031       | -            | 0.079        |
| <i>SOX9</i>   | <0.001      | <0.001        | 0.001        | -           | 0.031        | 0.003        |
| <i>RUNX2</i>  | <0.001      | <0.001        | -            | 0.001       | 0.007        | 0.003        |
| <i>COL2A1</i> | <0.001      | -             | <0.001       | <0.001      | 0.013        | 0.001        |
| <i>LEPR</i>   | -           | <0.001        | <0.001       | <0.001      | 0.028        | 0.001        |
